# Supplementary material
Source: publisher site journal article supplement (https://www.dovepress.com/article/352333)
Supplement: Supplementary file 1 [file get_supplementary_file.php]

# The potential role of small nucleolar RNAs in cancers

- an evidence map

(Supplementary materials)

## Content

|                                                                                                                 |    |
|-----------------------------------------------------------------------------------------------------------------|----|
| Table S1. List of included studies.....                                                                         | 2  |
| Table S2. Risk signature based on snoRNAs.....                                                                  | 11 |
| Table S3. Capability of the snoRNAs to discriminate malignant tumor, other disease and healthy individuals..... | 16 |
| Fig.S1 Trends in articles published from January 2008 to February 2022.....                                     | 21 |
| Fig.S2 Distribution of cancer types.....                                                                        | 22 |
| Fig.S3 Fractions of articles from each continent from January 2008 to February 2022.....                        | 23 |
| Fig.S4 Publication of articles on different cancer types in four continents.....                                | 24 |
| Fig.S5 The relationship between deregulated snoRNAs and cancer cell phenotype.....                              | 25 |

Supplementary materials - Table S1. List of included studies

**Table S1. List of included studies**

| Author         | Cancer             | SnoRNA                                               | Title                                                                                                                                          |
|----------------|--------------------|------------------------------------------------------|------------------------------------------------------------------------------------------------------------------------------------------------|
| Cui C          | NSCLC              | SNORA65, SNORA7A, SNORA7B                            | NOP10 predicts lung cancer prognosis and its associated small nucleolar RNAs drive proliferation and migration                                 |
| Liu Z          | HCC                | SNORA23                                              | SNORA23 inhibits HCC tumorigenesis by impairing the 2'-O-ribose methylation level of 28S rRNA                                                  |
| Shang X        | ccRCC              | SNORD63, SNORD96A                                    | SNORD63 and SNORD96A as the non-invasive diagnostic biomarkers for clear cell renal cell carcinoma                                             |
| Dong X         | NSCLC              | SNORD55                                              | Tumor-educated platelet SNORD55 as a potential biomarker for the early diagnosis of non-small cell lung cancer                                 |
| Su X           | BC                 | SNORD50A, SNORD50B                                   | The noncoding RNAs SNORD50A and SNORD50B-mediated TRIM21-GMPS interaction promotes the growth of p53 wild-type breast cancers by degrading p53 |
| He JY          | Colon cancer       | SNORD16                                              | Small Nucleolar RNA, C/D Box 16 (SNORD16) Acts as a Potential Prognostic Biomarker in Colon Cancer                                             |
| Li C           | HCC                | SNORD52                                              | The C/D box small nucleolar RNA SNORD52 regulated by Upf1 facilitates Hepatocarcinogenesis by stabilizing CDK1                                 |
| Roychowdhury A | Cervical carcinoma | SNORD97, SNORD3A, SNORD3C, SNORD3D, SNORA12, SCARNA9 | Deregulation of H19 is associated with cervical carcinoma                                                                                      |
| Guerrieri AN   | BC                 | SNORA67                                              | DKC1 Overexpression Induces a More Aggressive Cellular Behavior and Increases Intrinsic Ribosomal Activity in Immortalized Mammary Gland Cells |

Supplementary materials - Table S1. List of included studies

| Author     | Cancer       | SnoRNA                    | Title                                                                                                                       |
|------------|--------------|---------------------------|-----------------------------------------------------------------------------------------------------------------------------|
| Zhang L    | OC           | SNORA72                   | SNORA72 Activates the Notch1/c-Myc Pathway to Promote Stemness Transformation of Ovarian Cancer Cells                       |
| Mao LH     | HCC          | SNORD72                   | LncRNA-LALR1 upregulates small nucleolar RNA SNORD72 to promote growth and invasion of hepatocellular carcinoma             |
| Xia XR     | Glioma       | SNORD44                   | Effects of small nucleolar RNA SNORD44 on the proliferation, apoptosis and invasion of glioma cells                         |
| Ding Y     | HCC          | SNORD31                   | Revealing the clinical significance and prognostic value of small nucleolar RNA SNORD31 in hepatocellular carcinoma         |
| Zhang Z    | CRC          | SNORA71A                  | SNORA71A Promotes Colorectal Cancer Cell Proliferation, Migration, and Invasion                                             |
| Pauli C    | AML          | SNORD42A                  | Site-specific methylation of 18S ribosomal RNA by SNORD42A is required for acute myeloid leukemia cell proliferation        |
| Wu H       | CRC          | SNORD12C, SNORD78         | Long noncoding RNA ZFAS1 promoting small nucleolar RNA-mediated 2'-O-methylation via NOP58 recruitment in colorectal cancer |
| Godel M    | Osteosarcoma | SNORD3A, SNORA13, SNORA28 | Small Nucleolar RNAs Determine Resistance to Doxorubicin in Human Osteosarcoma                                              |
| Ding Y     | HCC          | SNORA71A                  | Identification of snoRNA SNORA71A as a Novel Biomarker in Prognosis of Hepatocellular Carcinoma                             |
| Duan S     | BC           | SNORA71B                  | SNORA71B promotes breast cancer cells across blood-brain barrier by inducing epithelial-mesenchymal transition              |
| Oliveira V | MM           | ACA11                     | The snoRNA target of t(4;14) in multiple myeloma regulates ribosome biogenesis                                              |
| McMahon M  | SH-HCC       | SNORA24                   | A single H/ACA small nucleolar RNA mediates tumor suppression downstream of oncogenic RAS                                   |
| Kitagawa T | PDAC         | SNORA74A, SNORA25         | Circulating pancreatic cancer exosomal RNAs for detection of pancreatic cancer                                              |

Supplementary materials - Table S1. List of included studies

| Author  | Cancer             | SnoRNA                                            | Title                                                                                                                                                                 |
|---------|--------------------|---------------------------------------------------|-----------------------------------------------------------------------------------------------------------------------------------------------------------------------|
| Li Y    | GC                 | SNORA42,SNORA74A,SNOR D10                         | SRPK1 facilitates tumor cell growth via modulating the small nucleolar RNA expression in gastric cancer                                                               |
| Wang X  | GC                 | U66, ACA47, ACA10, E2, SNORA58, HBII-316, U70, U8 | Identification of Eight Small Nucleolar RNAs as Survival Biomarkers and Their Clinical Significance in Gastric Cancer                                                 |
| Qin Y   | Gallbladder cancer | SNORA21                                           | Overexpression of SNORA21 suppresses tumorigenesis of gallbladder cancer in vitro and in vivo                                                                         |
| Sun Y   | BC                 | SNORA7B                                           | H/ACA box small nucleolar RNA 7B acts as an oncogene and a potential prognostic biomarker in breast cancer                                                            |
| Zhu W   | OC                 | SNORA2B, SNORD19, SNORD116-4, SNORD89             | SNORD89 promotes stemness phenotype of ovarian cancer cells by regulating Notch1-c-Myc pathway                                                                        |
| Tang G  | NSCLC              | SNORA71A                                          | Small Nucleolar RNA 71A Promotes Lung Cancer Cell Proliferation, Migration and Invasion via MAPK/ERK Pathway                                                          |
| Zhang C | GC                 | SNORD105B                                         | C/D-Box Snord105b Promotes Tumorigenesis in Gastric Cancer via ALDOA/C-Myc Pathway                                                                                    |
| Yi C    | PCa                | SNORA42                                           | SNORA42 enhances prostate cancer cell viability, migration and EMT and is correlated with prostate cancer poor prognosis                                              |
| Liu CX  | GC                 | SNORA21                                           | The SNORA21 expression is upregulated and acts as a novel independent indicator in human gastric cancer prognosis                                                     |
| Wang H  | HCC                | snoU2_19                                          | Small nucleolar RNA U2_19 promotes hepatocellular carcinoma progression by regulating Wnt/ $\beta$ -catenin signaling                                                 |
| Yang Y  | OC                 | SNORD114-10                                       | Preliminary screening and identification of differentially expressed metastasis-related ncRNAs in ovarian cancer                                                      |
| Cao P   | HCC                | SNORA18L5                                         | Germline Duplication of SNORA18L5 Increases Risk for HBV-related Hepatocellular Carcinoma by Altering Localization of Ribosomal Proteins and Decreasing Levels of p53 |

Supplementary materials - Table S1. List of included studies

| Author        | Cancer          | SnoRNA                                                  | Title                                                                                                                               |
|---------------|-----------------|---------------------------------------------------------|-------------------------------------------------------------------------------------------------------------------------------------|
| Zhou F        | Leukaemia       | SNORD14D, SNORD34, SNORD35A, SNORD43, SNORD53, SNORD104 | AML1-ETO requires enhanced C/D box snoRNA/RNP formation to induce self-renewal and leukaemia                                        |
| Li G          | HCC             | SNORA47                                                 | Small nucleolar RNA 47 promotes tumorigenesis by regulating EMT markers in hepatocellular carcinoma                                 |
| Savelyeva AV  | NSCLC           | U1, U5, U6                                              | Variety of RNAs in Peripheral Blood Cells, Plasma, and Plasma Fractions                                                             |
| Siprashvili Z | Melanoma, NSCLC | SNORD50A, SNORD50B                                      | The noncoding RNAs SNORD50A and SNORD50B bind K-Ras and are recurrently deleted in human cancer                                     |
| Su Y          | NSCLC           | SNORD66, SNORD78                                        | Small non-coding RNA biomarkers in sputum for lung cancer diagnosis                                                                 |
| Crea F        | PCa             | SNORA55                                                 | Integrated analysis of the prostate cancer small-nucleolar transcriptome reveals SNORA55 as a driver of prostate cancer progression |
| Xu G          | HCC             | SNORD113-1                                              | Small nucleolar RNA 113-1 suppresses tumorigenesis in hepatocellular carcinoma                                                      |
| Mannoor K     | NSCLC           | SNORA3, SNORA42                                         | Small nucleolar RNA signatures of lung tumor-initiating cells                                                                       |
| Chu L         | MM              | ACA11                                                   | Multiple myeloma-associated chromosomal translocation activates orphan snoRNA ACA11 to suppress oxidative stress                    |
| Valleron W    | Acute leukemia  | SNORD114-1                                              | Specific small nucleolar RNA expression profiles in acute leukemia                                                                  |
| Valleron W    | PTCL            | U3, HBII-239, U59B, U90, HBII-438A, U80                 | Small nucleolar RNA expression profiling identifies potential prognostic markers in peripheral T-cell lymphoma                      |
| HE Gee        | BC, HNSCC       | RNU44, RNU43, RNU48, RNU6B                              | The small-nucleolar RNAs commonly used for microRNA normalisation correlate with tumour pathology and prognosis                     |
| Liao J        | NSCLC           | SNORD33, SNORD66, SNORD76                               | Small nucleolar RNA signatures as biomarkers for non-small-cell lung cancer                                                         |
| Dong XY       | BC              | snoRNA U50                                              | Implication of snoRNA U50 in human breast cancer.                                                                                   |

Supplementary materials - Table S1. List of included studies

| Author          | Cancer       | SnoRNA                                               | Title                                                                                                                                             |
|-----------------|--------------|------------------------------------------------------|---------------------------------------------------------------------------------------------------------------------------------------------------|
| Dong XY         | PCa          | snoRNA U50                                           | SnoRNA U50 is a candidate tumor-suppressor gene at 6q14.3 with a mutation associated with clinically significant prostate cancer.                 |
| Wu L            | HCC          | ACA11                                                | Small nucleolar RNA ACA11 promotes proliferation, migration and invasion in hepatocellular carcinoma by targeting the PI3K/AKT signaling pathway. |
| Ma P            | HCC          | SNORD78                                              | Up-regulation of small nucleolar RNA 78 is correlated with aggressive phenotype and poor prognosis of hepatocellular carcinoma                    |
| Fang X          | HCC、CRC      | SNORD126                                             | SNORD126 promotes HCC and CRC cell growth by activating the PI3K-AKT pathway through FGFR2                                                        |
| Gao L           | NSCLC        | SNORA47, SNORA68, SNORA78, SNORA21, SNORD28, SNORD66 | Genome-wide small nucleolar RNA expression analysis of lung cancer by next-generation deep sequencing                                             |
| Su J            | NSCLC        | SNORA80E, SNORD33, SNORD66, SNORD78                  | Analysis of small nucleolar RNAs in sputum for lung cancer diagnosis                                                                              |
| Langhendries JL | NSCLC、BC     | U3、U8                                                | The human box C/D snoRNAs U3 and U8 are required for pre-rRNA processing and tumorigenesis                                                        |
| Blenkiron C     | BC           | SNORD29, SNORD34, SNORD68, SNORD33                   | Links between the oncoprotein YB-1 and small non-coding RNAs in breast cancer                                                                     |
| Su H            | BC           | -                                                    | Elevated snoRNA biogenesis is essential in breast cancer                                                                                          |
| Patterson DG    | BC           | snoRNA-93                                            | Human snoRNA-93 is processed into a microRNA-like RNA that promotes breast cancer cell invasion                                                   |
| Mei YP          | NSCLC        | SNORA42                                              | Small nucleolar RNA 42 acts as an oncogene in lung tumorigenesis                                                                                  |
| Xu B            | Glioblastoma | SNORD47                                              | SNORD47, a box C/D snoRNA, suppresses tumorigenesis in glioblastoma                                                                               |
| Okugawa Y       | CRC          | SNORA42                                              | Clinical significance of SNORA42 as an oncogene and a prognostic biomarker in colorectal cancer                                                   |

Supplementary materials - Table S1. List of included studies

| Author             | Cancer       | SnoRNA                         | Title                                                                                                                                                                                                                              |
|--------------------|--------------|--------------------------------|------------------------------------------------------------------------------------------------------------------------------------------------------------------------------------------------------------------------------------|
| Yoshida K          | CRC          | SNORA21                        | SNORA21—an oncogenic small nucleolar RNA, with a prognostic biomarker potential in human colorectal cancer                                                                                                                         |
| Yang X             | CRC          | SNORA15, SNORA41, SNORD33      | SnoRNAs are involved in the progression of ulcerative colitis and colorectal cancer                                                                                                                                                |
| Chen L             | Glioblastoma | SNORD76                        | SNORD76, a box C/D snoRNA, acts as a tumor suppressor in glioblastoma                                                                                                                                                              |
| Wu L               | HCC          | SNORD76                        | Clinical significance of C/D box small nucleolar RNA U76 as an oncogene and a prognostic biomarker in hepatocellular carcinoma.                                                                                                    |
| Martens-Uzunova ES | PCa          | SNORD78                        | C/D-box snoRNA-derived RNA production is associated with malignant transformation and metastatic progression in prostate cancer                                                                                                    |
| Cui L              | PDAC         | SNORA23                        | Small nucleolar noncoding RNA SNORA23, up-regulated in human pancreatic ductal adenocarcinoma, regulates expression of spectrin repeat-containing nuclear envelope 2 to promote growth and metastasis of xenograft tumors in mice. |
| Zou AE             | HNSCC        | SNORD35B                       | Transcriptome sequencing uncovers novel long noncoding and small nucleolar RNAs dysregulated in head and neck squamous cell carcinoma                                                                                              |
| Krell J            | CRC          | U44,U47                        | Growth arrest-specific transcript 5 associated snoRNA levels are related to p53 expression and DNA damage in colorectal cancer.                                                                                                    |
| Yuan S             | CRC          | SNORD44                        | An oncolytic adenovirus expressing SNORD44 and GAS5 exhibits antitumor effect in colorectal cancer cells                                                                                                                           |
| Teittinen KJ       | Leukemic     | -                              | Expression of small nucleolar RNAs in leukemic cells                                                                                                                                                                               |
| Ronchetti D        | CLL          | SNORA74A, SNORD116-18, SNORD56 | Small nucleolar RNAs as new biomarkers in chronic lymphocytic leukemia                                                                                                                                                             |

Supplementary materials - Table S1. List of included studies

| Author      | Cancer                     | SnoRNA                                                                                                                                                                | Title                                                                                                                                                      |
|-------------|----------------------------|-----------------------------------------------------------------------------------------------------------------------------------------------------------------------|------------------------------------------------------------------------------------------------------------------------------------------------------------|
| Berquet L   | CLL                        | SNORA12,SNORA22,SNORA27,SNORA56,SNORA70,SNORD1A,SNORD,SNORD105B,SCARNA8,SNORA80                                                                                       | Small nucleolar RNA expression profiles refine the prognostic impact of IGHV mutational status on treatment-free survival in chronic lymphocytic leukaemia |
| Boone DN    | BC                         | SNORA17, SNORA43                                                                                                                                                      | SNHG7 is a lncRNA oncogene controlled by Insulin-like Growth Factor signaling through a negative feedback loop to tightly regulate proliferation           |
| Schulten HJ | BC                         | SNORA1,SNORA2A,SNORA9,SNORA10,SNORA22,SNORA24,SNORA30,SNORA37,SNORA38,SNORA52,SNORA71A,SNORA71B,SNORA71C,SNORD13P2,SNORD15A,SNORD34,SNORD35A,SNORD41,SNORD53,SCARNA22 | Comprehensive molecular biomarker identification in breast cancer brain metastases                                                                         |
| Krishnan P  | BC                         | SNORD46, SNORD89                                                                                                                                                      | Profiling of small nucleolar RNAs by next generation sequencing:Potential new players for breast cancer prognosis                                          |
| Gong J      | NSCLC、 BC                  | SNORD46                                                                                                                                                               | A pan-cancer analysis of the expression and clinical relevance of small nucleolar RNAs in human cancer                                                     |
| Yu F        | BC                         | SNORD28, SNORD25                                                                                                                                                      | p53 represses the oncogenic Sno-MiR-28 derived from a SnoRNA                                                                                               |
| Zhao Y      | Renal clear cell carcinoma | SNORA2, SNORD12B, SNORA59B, SNORA70B, SNORD93, SNORD116-2                                                                                                             | Expression signature of six-snoRNA serves as novel non-invasive biomarker for diagnosis and prognosis prediction of renal clear cell carcinoma             |
| Kothari C   | BC                         | SNORD115,SNORD114                                                                                                                                                     | Identification of a gene signature for different stages of breast cancer development that could be used for early diagnosis and specific therapy           |



Supplementary materials - Table S1. List of included studies

| Author     | Cancer | SnoRNA           | Title                                                                                                                                              |
|------------|--------|------------------|----------------------------------------------------------------------------------------------------------------------------------------------------|
| Liu Y      | CRC    | SNORD1C          | Overexpression of small nucleolar RNA SNORD1C is associated with unfavorable outcome in colorectal cancer                                          |
| Zheng D    | NSCLC  | SNORD78          | Small nucleolar RNA 78 promotes the tumorigenesis in non-small cell lung cancer                                                                    |
| Li H       | GBM    | SNORD76          | SnoRNA SNORD76 is downregulated in glioblastoma and inhibits cell proliferation through cyclinD1 and p21                                           |
| Shan Y     | ESCC   | SNORA42          | SNORA42 promotes oesophageal squamous cell carcinoma development through triggering the DHX9/p65 axis                                              |
| Qiao S     | HCC    | snoRA23          | snoRNA23 enhances the progression of hepatocellular carcinoma via regulation of the Wnt/ $\beta$ -catenin pathway                                  |
| Hu T       | BC     | SNORA71A         | Small nucleolar RNA SNORA71A promotes epithelial-mesenchymal transition by maintaining ROCK2 mRNA stability in breast cancer                       |
| Li JN      | BC     | U50A (SNORD50A ) | Expression of SnoRNA U50A Is Associated with Better Prognosis and Prolonged Mitosis in Breast Cancer                                               |
| Wang G     | HCC    | SNORA42          | Small nucleolar RNA 42 promotes the growth of hepatocellular carcinoma through the p53 signaling pathway                                           |
| Liang J    | HCC    | SNORD17          | Non-coding small nucleolar RNA SNORD17 promotes the progression of hepatocellular carcinoma through a positive feedback loop upon p53 inactivation |
| Ding Y     | HCC    | SNORA52          | Downregulation of snoRNA SNORA52 and Its Clinical Significance in Hepatocellular Carcinoma                                                         |
| Appaiah HN | BC     | U6               | Persistent upregulation of U6:SNORD44 small RNA ratio in the serum of breast cancer patients                                                       |
| Pacilli A  | CRC    | SNORD50A         | SnoRNA U50 Levels Are Regulated by Cell Proliferation and rRNA Transcription                                                                       |
| Xu L       | CRC    | snord12B         | Distinct Profiles for Mitochondrial t-RNAs and Small Nucleolar RNAs in Locally Invasive and Metastatic Colorectal Cancer                           |

Supplementary materials - Table S1. List of included studies

| Author            | Cancer   | SnoRNA                                                | Title                                                                                                                                                   |
|-------------------|----------|-------------------------------------------------------|---------------------------------------------------------------------------------------------------------------------------------------------------------|
| Langhendries J-L  | LUAD, BC | U3, U8                                                | The human box C/D snoRNAs U3 and U8 are required for prer-RNA processing and tumorigenesis                                                              |
| Fang X            | HCC,CRC  | SNORD126                                              | SNORD126 promotes HCC and CRC cell growth by activating the PI3K-AKT pathway through FGFR2                                                              |
| Bagheri A         | NSCLC    | SNORD37                                               | Altered miR-223 expression in sputum for diagnosis of non-small cell lung cancer                                                                        |
| Tian B            | ESCC     | SNORD12B                                              | Oncogenic SNORD12B activates the AKT-mTOR-4EBP1 signaling in esophageal squamous cell carcinoma via nucleus partitioning of PP-1 $\alpha$               |
| Chen X            | HCC      | SNORD105                                              | An SNP reducing SNORD105 and PPAN expression decreases the risk of hepatocellular carcinoma in a Chinese population                                     |
| Xu W              | HCC      | SNORD126                                              | SnoRD126 promotes the proliferation of hepatocellular carcinoma cells through transcriptional regulation of FGFR2 activation in combination with hnRNPK |
| Wang K            | NSCLC    | SNORD83A                                              | Plasma SNORD83A as a potential biomarker for early diagnosis of non-small-cell lung cancer                                                              |
| Faucher-Giguère L | OC       | SNORA81, SNORA19, SNORA56                             | High-grade ovarian cancer associated H/ACA snoRNAs promote cancer cell proliferation and survival                                                       |
| Wan R             | LUAD     | SNORD14A,SNORD59A, SNORD99,SNORD100, SNORD63, SNORD19 | Discovery of tumor immune infiltration-related snoRNAs for predicting tumor immune microenvironment status and prognosis in lung adenocarcinoma         |

Abbreviations: NSCLC = non-small cell lung cancer, HCC = hepatocellular carcinoma, SH-HCC = resembles human steatohepatitic HCC, ccRCC = clear cell renal cell carcinoma, BC = Breast cancer, OC = ovarian cancer, PCa = Prostate cancer, GC = Gastric cancer, MM = Multiple myeloma, PTCL = Peripheral T-cell lymphoma, HNSCC = Head and neck squamous cell carcinoma, CRC = Colorectal cancer, PDAC = Pancreatic ductal adenocarcinoma, CLL = Chronic lymphocytic leukemia, AML = Acute myeloid leukemia, ESCC = Esophageal Squamous Cell Carcinoma LUAD = Lung adenocarcinoma.

**Table S2. Risk signature based on snoRNAs.**

| Author     | Cancer                     | Risk formula                                                                                                                                                                                                                                                                                                      | Expression data of snoRNAs                          | Clinical validation                               | HR (95%CI, P value)          | AUC                                                              |
|------------|----------------------------|-------------------------------------------------------------------------------------------------------------------------------------------------------------------------------------------------------------------------------------------------------------------------------------------------------------------|-----------------------------------------------------|---------------------------------------------------|------------------------------|------------------------------------------------------------------|
| Gao L[1]*  | NSCLC                      | $(411.959 * \text{expression of snoRA78}) + (2.34241 * \text{expression of snoRA47}) - (0.30167 * \text{expression of snoRA68}) - 0.7693.$                                                                                                                                                                        | Next-generation deep sequencing in 12 NSCLC tissues | training set of 77 cases; testing set of 49 cases | -                            | 1 year: 0.701<br>3 year: 0.721<br>5 year: 0.744<br>7 year: 0.759 |
| Wang X[2]* | Gastric cancer             | $(0.0496 * \text{expression of U66}) + (-0.0191 * \text{expression of ACA47}) + (0.0363 * \text{expression of ACA10}) + (-0.1711 * \text{expression of E2}) + (0.0650 * \text{expression of SNORA58}) + (0.0953 * \text{expression of HBII-316}) + (-0.4749 * \text{U70}) + (-0.2352 * \text{expression of U8}).$ | SNORic                                              | -                                                 | 3.43 (1.93–6.09, P=2.72e-05) | 0.828                                                            |
| Zhao Y[3]* | Renal clear cell carcinoma | $(-0.2791 * \text{expression of SNORA2}) + (-0.2461 * \text{expression of SNORD116-2}) + (-0.1322 * \text{expression of SNORA59B}) + (0.2680 * \text{expression of SNORD93}) + (0.2330 * \text{expression of SNORD12B}) + (0.4199 * \text{expression of SNORA70B}).$                                              | TCGA                                                | 64 clinical tissue cases; 50 serum samples        | -                            | -                                                                |

Supplementary materials - Table S2. Risk signature based on snoRNAs.

| Author      | Cancer                   | Risk formula                                                                                                                                                                                                                                                                                                                                                                        | Expression data of snoRNAs | Clinical validation | HR (95%CI, P value)                                                                                 | AUC                                             |
|-------------|--------------------------|-------------------------------------------------------------------------------------------------------------------------------------------------------------------------------------------------------------------------------------------------------------------------------------------------------------------------------------------------------------------------------------|----------------------------|---------------------|-----------------------------------------------------------------------------------------------------|-------------------------------------------------|
| Cao R[4]#   | Bladder cancer           | $(0.01794 * \text{expression of SNORD113-9}) + (0.02659 * \text{expression of U3}) + (0.00104 * \text{expression of U49A}) + (0.0002 * \text{expression of SNORD114-1}) + (-0.0031 * \text{expression of SNORD19B})$                                                                                                                                                                | SNORic                     | -                   | Training cohort:<br>2.14 (1.48–3.08, P < 0.0001)<br>Testing cohort:<br>2.03 (1.19–3.47, P < 0.0001) | 1 year: 0.702<br>3 year: 0.664<br>5 year: 0.710 |
| Huang L[5]# | Colon adenocarcinoma     | $(0.263 * \text{expression of SNORD14E}) + (-0.079 * \text{expression of SNORD67})$                                                                                                                                                                                                                                                                                                 | TCGA                       | -                   | 7.489 (1.567-35.793, P= 0.012)                                                                      | -                                               |
| Liu J[6]#   | Sarcoma                  | $(-0.1803 * \text{expression of U3}) + (0.1826 * \text{expression of SNORA73B}) + (0.2846 * \text{expression of SNORD46}) + (0.1613 * \text{expression of SNORA26})$                                                                                                                                                                                                                | TCGA                       | -                   | 2.378 (1.560-3.625, P < 0.001)                                                                      | 1 year: 0.727                                   |
| Yi Q[7]#    | Uveal melanoma           | $(-1.602 * \text{ACA17}) + (0.803 * \text{ACA45}) + (0.603 * \text{HBII-276}) + (1.348 * \text{SNORD12})$                                                                                                                                                                                                                                                                           | SNORic                     | -                   | -                                                                                                   | -                                               |
| Yang H[8]#  | Hepatocellular carcinoma | $(0.0655 * \text{expression of SNORA24}) + (0.0991 * \text{expression of SNORA7}) + (0.1196 * \text{expression of SNORA63}) + (0.2590 * \text{expression of U3_chr8-2}) + (0.2464 * \text{expression of U3_chr9}) + (0.0613 * \text{expression of SNOR19B}) + (0.1653 * \text{expression of hTR}) + (0.0830 * \text{expression of SNORD36C}) + (0.0964 * \text{expression of U44})$ | SNORic                     | -                   | 2.778 (1.904-4.051, P < 0.001)                                                                      | 0.731                                           |

Supplementary materials - Table S2. Risk signature based on snoRNAs.

| Author       | Cancer              | Risk formula                                                                                                                                                                                                                                                                                                                                                                                                                    | Expression data of snoRNAs | Clinical validation | HR (95%CI, P value)           | AUC                                            |
|--------------|---------------------|---------------------------------------------------------------------------------------------------------------------------------------------------------------------------------------------------------------------------------------------------------------------------------------------------------------------------------------------------------------------------------------------------------------------------------|----------------------------|---------------------|-------------------------------|------------------------------------------------|
| He RQ[9]#    | Bladder carcinoma   | (-0.168 * expression of SNORD114-11) + (0.201 * expression of SNORD114-14) – (0.229 * expression of SNORD114-15) + (0.543 * expression of SNORD114-9) – (0.198 * expression of SNORA55) – (0.192 * expression of SNORA60) – (0.167 * expression of SNORD88A) – (0.314 * expression of SNORD69) – (0.226 * expression of SNORD20) + (0.432 * expression of U49A) – (0.335 * expression of SNORD51) + (0.514 * expression of U74) | SNORic                     | -                   | 2.5 (1.828–3.420, P<0.001)    | 0.719                                          |
| Xing L[10]#  | HNSCC               | SNORD114 - 17, SNORA36B, SNORD78, U3(chr2), U3(chr17)<br>(The authors did not provide specific details of the signature.)                                                                                                                                                                                                                                                                                                       | UCSC Xena, CGHub           | -                   | 2.41 (1.8–3.21, P<0.0001)     | 1 year: 0.674<br>3 year: 0.704<br>5 year: 0.66 |
| Zhang L[11]# | Lung adenocarcinoma | (0.1293 * expression of snoU109) + (0.1046 * expression of SNORA5A) + (– 0.2012 * expression of SNORA70) + (– 0.1005 * expression of SNORD104) + (– 0.1155 * expression of U3)                                                                                                                                                                                                                                                  | TCGA                       | -                   | 1.476 (1.096–1.987, P=0.0064) | 1 year: 0.61<br>5 year: 0.618<br>9 year: 0.666 |

Supplementary materials - Table S2. Risk signature based on snoRNAs.

| Author    | Cancer              | Risk formula                                                                                                                | Expression data of snoRNAs | Clinical validation | HR (95%CI, P value)                                                                    | AUC                          |
|-----------|---------------------|-----------------------------------------------------------------------------------------------------------------------------|----------------------------|---------------------|----------------------------------------------------------------------------------------|------------------------------|
| Wan R[12] | Lung adenocarcinoma | SNORD14A, SNORD59A, SNORD99, SNORD100, SNORD63, SNORD19<br>(The authors did not provide specific details of the signature.) | GEO, TCGA, CCLE project    | -                   | TCGA-LUAD: 4.605 (3.259 - 6.508, P<0.001);<br>GSE81089: 2.044 (1.134 - 3.684, P=0.017) | 3 year: 0.83<br>5 year: 0.82 |

\* Included studies.

# Supplementary studies, bioinformatics articles without subsequent validation by wet lab methods.

Abbreviations: HR = Hazard ratio; CI = Confidence interval; AUC = Area under curve; NSCLC = Non - small cell lung cancer; SNORic = snoRNA in cancers; TCGA = The cancer genome atlas; HNSCC = Head and neck squamous cell carcinoma; CGHub = the Cancer Genomics Hub GEO = Gene Expression Omnibus, CCLE = Cancer Cell Line Encyclopedia.

#### References

1. Gao, L., et al., Genome-wide small nucleolar RNA expression analysis of lung cancer by next-generation deep sequencing. *Int J Cancer*, 2015. 136(6): p. E623-9.
2. Wang, X., et al., Identification of Eight Small Nucleolar RNAs as Survival Biomarkers and Their Clinical Significance in Gastric Cancer. *Front Oncol*, 2019. 9: p. 788.
3. Zhao, Y., et al., Expression signature of six-snoRNA serves as novel non-invasive biomarker for diagnosis and prognosis prediction of renal clear cell carcinoma. *J Cell Mol Med*, 2020. 24(3): p. 2215-2228.
4. Cao, R., et al., Small nucleolar RNAs signature (SNORS) identified clinical outcome and prognosis of bladder cancer (BLCA). *Cancer Cell Int*, 2020. 20: p. 299.
5. Huang, L., et al., Prognostic value of small nucleolar RNAs (snoRNAs) for colon adenocarcinoma based on RNA sequencing data. *Pathology Research and Practice*, 2020. 216(6).
6. Liu, J., et al., Identification of potential prognostic small nucleolar RNA biomarkers for predicting overall survival in patients with sarcoma. *Cancer Med*, 2020. 9(19): p. 7018-7033.
7. Yi, Q. and W.J. Zou, A novel four- snoRNA signature for predicting the survival of patients with uveal melanoma. *Mol Med Rep*, 2019. 19(2): p.

Supplementary materials - Table S2. Risk signature based on snoRNAs.

1294-1301.

8. Yang, H., et al., Genomic analysis of small nucleolar RNAs identifies distinct molecular and prognostic signature in hepatocellular carcinoma. *Oncol Rep*, 2018. 40(6): p. 3346-3358.
9. He, R.Q., et al., Small Nucleolar RNAs (snoRNAs)-Based Risk Score Classifier Predicts Overall Survival in Bladder Carcinoma. *Med Sci Monit*, 2020. 26: p. e926273.
10. Xing L., et al., Expression scoring of a small - nucleolar - RNA signature identified by machine learning serves as a prognostic predictor for head and neck cancer. *J Cell Physiol*. 2020;235: 8071 - 8084.
11. Zhang L., et al., Identification of a novel snoRNA expression signature associated with overall survival in patients with lung adenocarcinoma: A comprehensive analysis based on RNA sequencing dataset. *Math Biosci Eng*. 2021 Sep 10;18(6):7837-7860.
12. Wan R., et al., Discovery of tumor immune infiltration-related snoRNAs for predicting tumor immune microenvironment status and prognosis in lung adenocarcinoma. *Comput Struct Biotechnol J*. 2021 Nov 25;19:6386-6399.

**Table S3. Capability of the snoRNAs to discriminate malignant tumor, other disease and healthy individuals.**

| Author     | Tumor       | Specimen | snoRNA              | AUC; 95% CI     | Sensitivity | Specificity | Remark |
|------------|-------------|----------|---------------------|-----------------|-------------|-------------|--------|
| Shang X[1] | ccRCC       | plasma   | SNORD63             | 0.5161          | 95%         | 27.30%      |        |
|            |             |          | SNORD96A            | 0.8909          | 90%         | 80%         |        |
|            |             |          | combination         | 0.9205          | 80.00%      | 97.50%      |        |
|            |             | US       | SNORD63             | 0.7055          | 47.90%      | 86.70%      |        |
|            |             |          | SNORD96A            | 0.6788          | 53.10%      | 77.30%      |        |
|            |             |          | combination         | 0.71            | 43.70%      | 89.30%      |        |
|            | early ccRCC | plasma   | SNORD63             | 0.6144          | 95%         | 39.10%      |        |
|            |             |          | SNORD96A            | 0.9359          | 95%         | 87%         |        |
|            |             |          | combination         | 0.937           | 82.60%      | 97.50%      |        |
|            |             | US       | SNORD63             | 0.6884          | 47.90%      | 82.10%      |        |
|            |             |          | SNORD96A            | 0.6701          | 53.10%      | 79.50%      |        |
|            |             |          | combination         | 0.6944          | 92.30%      | 39.60%      |        |
| Dong X[2]  | NSCLC       | plasma   | TEP SNORD55         | 0.803           | 79.30%      | 68.30%      |        |
|            | early NSCLC | plasma   | SNORD55             | 0.784           | 91.20%      | 49.70%      |        |
|            |             |          | TEP SNORD55 and CEA | 0.828           | 66.30%      | 90.00%      |        |
|            | LUAD        | plasma   | TEP SNORD55         | 0.791           | 77.90%      | 68.30%      |        |
|            | early LUAD  | plasma   | TEP SNORD55         | 0.759           | 89.70%      | 49.70%      |        |
|            | LUSC        | plasma   | TEP SNORD55         | 0.826           | 72.40%      | 77.70%      |        |
|            | early LUSC  | plasma   | TEP SNORD55         | 0.854           | 68.40%      | 93.10%      |        |
| He JY[3]   | CC          | tissues  | SNORD16             | 0.7 (0.53-0.86) |             |             |        |



Supplementary materials - Table S3. Capability of the snoRNAs to discriminate malignant tumor, other disease and healthy individuals.

| Author        | Tumor | Specimen | snoRNA         | AUC; 95% CI         | Sensitivity | Specificity | Remark |
|---------------|-------|----------|----------------|---------------------|-------------|-------------|--------|
| Kitagawa T[4] | PDAC  | serum    | SNORA74A       | 0.909 (0.807–1.000) |             |             |        |
|               |       |          | SNORA25        | 0.903 (0.795–1.000) |             |             |        |
|               |       |          | SNORA22        | 0.883 (0.774–0.993) |             |             |        |
|               |       |          | SNORA14B       | 0.875 (0.759–0.990) |             |             |        |
|               |       |          | SNORD22        | 0.862 (0.750–0.973) |             |             |        |
| Su Y[5]       | NSCLC | sputum   | SNORDs-66,78   | 0.86                | 73.91%      | 83.64%      |        |
|               |       |          | miRs-21,31,210 | and 0.94            | 89.13%      | 89.09%      |        |
|               |       |          | SNORDRDs-66,78 |                     |             |             |        |
| Liao J[6]     | NSCLC | plasma   | SNORD33        | 0.8233              | 72.97%      | 86.36%      | 1      |
|               |       |          | SNORD66        | 0.8139              | 75.68%      | 77.27%      |        |
|               |       |          | SNORD76        | 0.8064              | 70.27%      | 90.91%      |        |
|               |       |          | combination    | 0.89                | 83.78%      | 95.45%      |        |
|               |       |          | SNORD33        | 0.82                | 72.97%      | 84.62%      | 2      |
|               |       |          | SNORD66        | 0.7903              | 72.97%      | 80.77%      |        |
|               |       |          | SNORD76        | 0.8149              | 70.27%      | 88.46%      |        |
| Gao L[7]      | NSCLC | tissues  | SNORA12        | 0.7456              | 75%         | 70%         |        |
|               |       |          | SNORA64        | 0.9025              | 80%         | 75%         |        |
|               |       |          | SNORA68        | 0.8325              | 75%         | 90%         |        |
|               |       |          | SNORA70        | 0.8925              | 70%         | 85%         |        |
|               |       |          | SNORA71A       | 0.8850              | 80%         | 80%         |        |
|               |       |          | SNORA71C       | 0.9425              | 95%         | 75%         |        |
|               |       |          | SNORD10        | 0.8850              | 95%         | 80%         |        |
|               |       |          | SNORD74        | 0.8750              | 70%         | 95%         |        |
|               |       |          | SNORD80        | 0.8625              | 80%         | 85%         |        |

Supplementary materials - Table S3. Capability of the snoRNAs to discriminate malignant tumor, other disease and healthy individuals.

| Author    | Tumor | Specimen | snoRNA       | AUC; 95% CI          | Sensitivity | Specificity | Remark |
|-----------|-------|----------|--------------|----------------------|-------------|-------------|--------|
| Su J[8]   | NSCLC | sputum   | SNORD96A     | 0.8225               | 80%         | 80%         |        |
|           |       |          | SNORA21      | 0.8900               | 80%         | 85%         |        |
|           |       |          | SNORD28      | 0.8475               | 80%         | 80%         |        |
|           |       |          | SNORA34      | 0.7475               | 80%         | 75%         |        |
|           |       |          | SNORA38B     | 0.7569               | 75%         | 80%         |        |
|           |       |          | SNORA47      | 0.7567               | 80%         | 75%         |        |
|           |       |          | SNORD66      | 0.7975               | 75%         | 80%         |        |
|           |       |          | SNORD33      | 0.7230 (0.630-0.816) |             |             |        |
|           |       |          | SNORA42      | 0.7431 (0.655-0.831) |             |             |        |
|           |       |          | SNORD66      | 0.8065 (0.725-0.888) |             |             |        |
| Yang X[9] | CRC   | tissues  | SNORD78      | 0.8112 (0.731-0.891) |             |             |        |
|           |       |          | SNORDs-66,78 | 0.86                 |             |             |        |
|           |       |          | SNORA15      | 0.808                | 59.09%      | 92.86%      | 3      |
|           |       |          | SNORA41      | 0.875                | 84.09%      | 64.29%      |        |
|           |       |          | SNORD33      | 0.938                | 86.36%      | 89.99%      |        |
|           |       |          | combination  | 0.995                | 90.84%      | 94.00%      |        |
|           |       |          | SNORA15      | 0.648                | 43.18%      | 99.99%      | 4      |
| Wu L[10]  | HCC   | tissues  | SNORA41      | 0.716                | 70.45%      | 71.43%      |        |
|           |       |          | SNORD33      | 0.845                | 84.09%      | 82.14%      |        |
|           |       |          | combination  | 0.841                | 75.47%      | 31.58%      |        |
|           |       |          | SNORD76      | 0.73 (0.64-0.81)     |             |             |        |

Supplementary materials - Table S3. Capability of the snoRNAs to discriminate malignant tumor, other disease and healthy individuals.

| Author        | Tumor | Specimen     | snoRNA                                                    | AUC; 95% CI        | Sensitivity | Specificity | Remark |
|---------------|-------|--------------|-----------------------------------------------------------|--------------------|-------------|-------------|--------|
| Zhao Y[11]    | ccRCC | tissues      | SNORA2, SNORD12B, SNORA59B, SNORA70B, SNORD93, SNORD116-2 | 0.800              |             |             |        |
|               |       | serum        | SNORA2, SNORD12B, SNORA59B, SNORA70B, SNORD93, SNORD116-2 | 0.747              |             |             |        |
| Liu Y[12]     | CRC   | serum        | SNORD1C                                                   | 0.748(0.670–0.826) | 79.80%      | 57.45%      |        |
|               |       |              | SNORD1C and CEA                                           | 0.838(0.774–0.901) | 85.86%      | 62.26%      |        |
| Hu T[13]      | BC    | tissue       | SNORA71A                                                  | 0.72               | 76.92%      | 61.54%      |        |
| Wang K[14]    | NSCLC | plasma       | SNORD83A                                                  | 0.7387             | 76%         | 60%         |        |
|               |       | early plasma | SNORD83A                                                  | 0.7016             | 84.7%       | 52.4%       |        |
| Bagheri A[15] | NSCLC | sputum       | SNORD37                                                   | 0.82(0.72–0.93)    | 93.3%       | 63.3%       |        |

Abbreviations: ccRCC = clear cell renal cell carcinoma, NSCLC = non - small cell lung cancer, LUAD = lung adenocarcinoma, LUSC = lung squamous cell carcinoma, CC = colon cancer, PDAC = Pancreatic ductal adenocarcinoma, HCC = hepatocellular carcinoma, COPD = chronic obstructive pulmonary disease, UC = ulcerative colitis, HC = healthy control, US = urinary sediment, TEP = tumor - educated platelet, CEA = carcinoembryonic antigen.

Note: 1. Distinguishing NSCLC from healthy subjects; 2. Distinguishing NSCLC from COPD; 3. Distinguishing CRC from HC; 4. Distinguishing CRC from UC.

#### References

1. Shang, X., et al., SNORD63 and SNORD96A as the non-invasive diagnostic biomarkers for clear cell renal cell carcinoma. *Cancer Cell Int*, 2021. 21(1): p. 56.
2. Dong, X., et al., Tumor-educated platelet SNORD55 as a potential biomarker for the early diagnosis of non-small cell lung cancer. *Thorac Cancer*, 2021. 12(5): p. 659-666.
3. He, J.Y., et al., Small Nucleolar RNA, C/D Box 16 (SNORD16) Acts as a Potential Prognostic Biomarker in Colon Cancer. *Dose Response*, 2020.

Supplementary materials - Table S3. Capability of the snoRNAs to discriminate malignant tumor, other disease and healthy individuals.

18(2): p. 1559325820917829.

4. Kitagawa, T., et al., Circulating pancreatic cancer exosomal RNAs for detection of pancreatic cancer. *Mol Oncol*, 2019. 13(2): p. 212-227.
5. Su, Y., et al., Small non-coding RNA biomarkers in sputum for lung cancer diagnosis. *Mol Cancer*, 2016. 15(1): p. 36.
6. Liao, J., et al., Small nucleolar RNA signatures as biomarkers for non-small-cell lung cancer. *Mol Cancer*, 2010. 9: p. 198.
7. Gao, L., et al., Genome-wide small nucleolar RNA expression analysis of lung cancer by next-generation deep sequencing. *Int J Cancer*, 2015. 136(6): p. E623-9.
8. Su, J., et al., Analysis of small nucleolar RNAs in sputum for lung cancer diagnosis. *Oncotarget*, 2016. 7(5): p. 5131-42.
9. Yang, X., et al., SnoRNAs are involved in the progression of ulcerative colitis and colorectal cancer. *Dig Liver Dis*, 2017. 49(5): p. 545-551.
10. Wu, L., et al., Clinical significance of C/D box small nucleolar RNA U76 as an oncogene and a prognostic biomarker in hepatocellular carcinoma. *Clin Res Hepatol Gastroenterol*, 2018. 42(1): p. 82-91.
11. Zhao, Y., et al., Expression signature of six-snoRNA serves as novel non-invasive biomarker for diagnosis and prognosis prediction of renal clear cell carcinoma. *J Cell Mol Med*, 2020. 24(3): p. 2215-2228.
12. Liu, Y., et al., Overexpression of small nucleolar RNA SNORD1C is associated with unfavorable outcome in colorectal cancer. *Bioengineered*, 2021. 12(1): p. 8943-8952.
13. Hu, T., et al., Small nucleolar RNA SNORA71A promotes epithelial-mesenchymal transition by maintaining ROCK2 mRNA stability in breast cancer. *Mol Oncol*, 2022.
14. Wang, K., et al., Plasma SNORD83A as a potential biomarker for early diagnosis of non-small-cell lung cancer. *Future Oncol*, 2021.
15. Bagheri, A., et al., Altered miR-223 Expression in Sputum for Diagnosis of Non-Small Cell Lung Cancer. *Avicenna J Med Biotechnol*, 2017. 9(4): p. 189-195.

Supplementary materials - Fig.S1 Trends in articles published from January 2008 to February 2022.

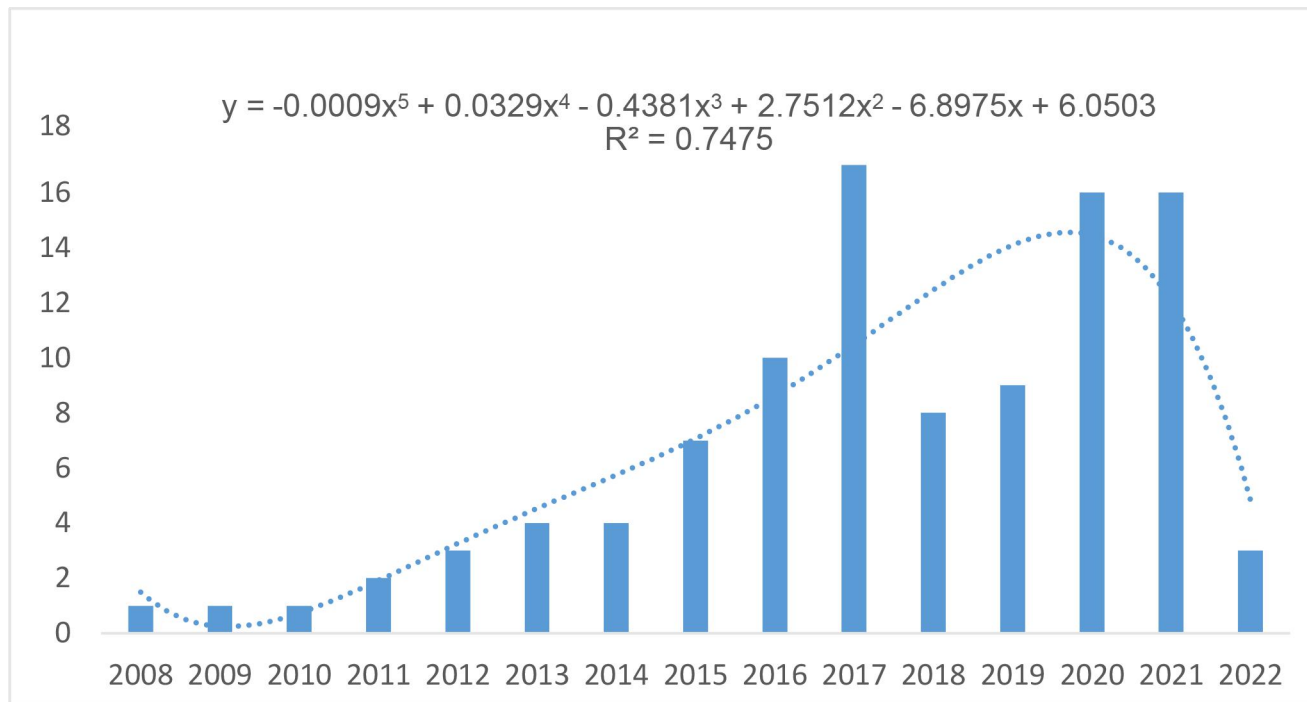

Fig.S1 Trends in articles published from January 2008 to February 2022.

Supplementary materials - Fig.S2 Distribution of cancer types.

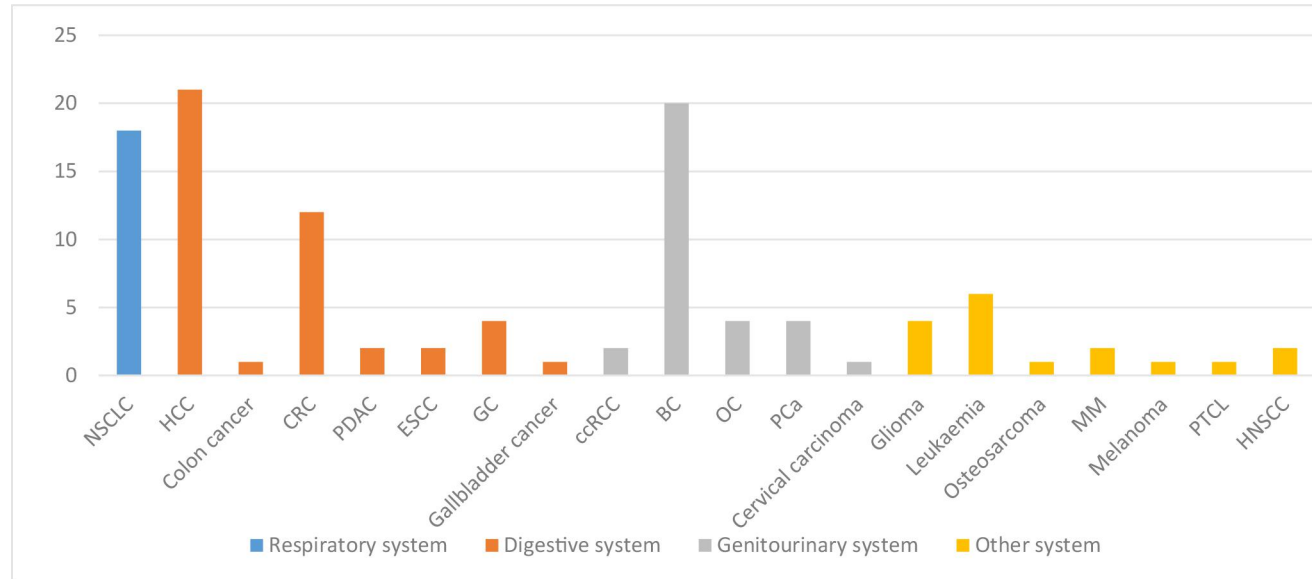

Fig.S2 Distribution of cancer types.

Abbreviations: NSCLC = Non-small cell lung cancer, HCC = Hepatocellular carcinoma, CRC = Colorectal cancer, PDAC = Pancreatic ductal adenocarcinoma, GC = Gastric cancer, ccRCC = Clear cell renal cell carcinoma, BC = Breast cancer, OC = Ovarian cancer, PCa = Prostate cancer, MM = Multiple myeloma, PTCL = Peripheral T-cell lymphoma, HNSCC = Head and neck squamous cell carcinoma, ESCC = Esophageal squamous cell carcinoma.

Supplementary materials - Fig.S3 Fractions of articles from each continent from January 2008 to February 2022.

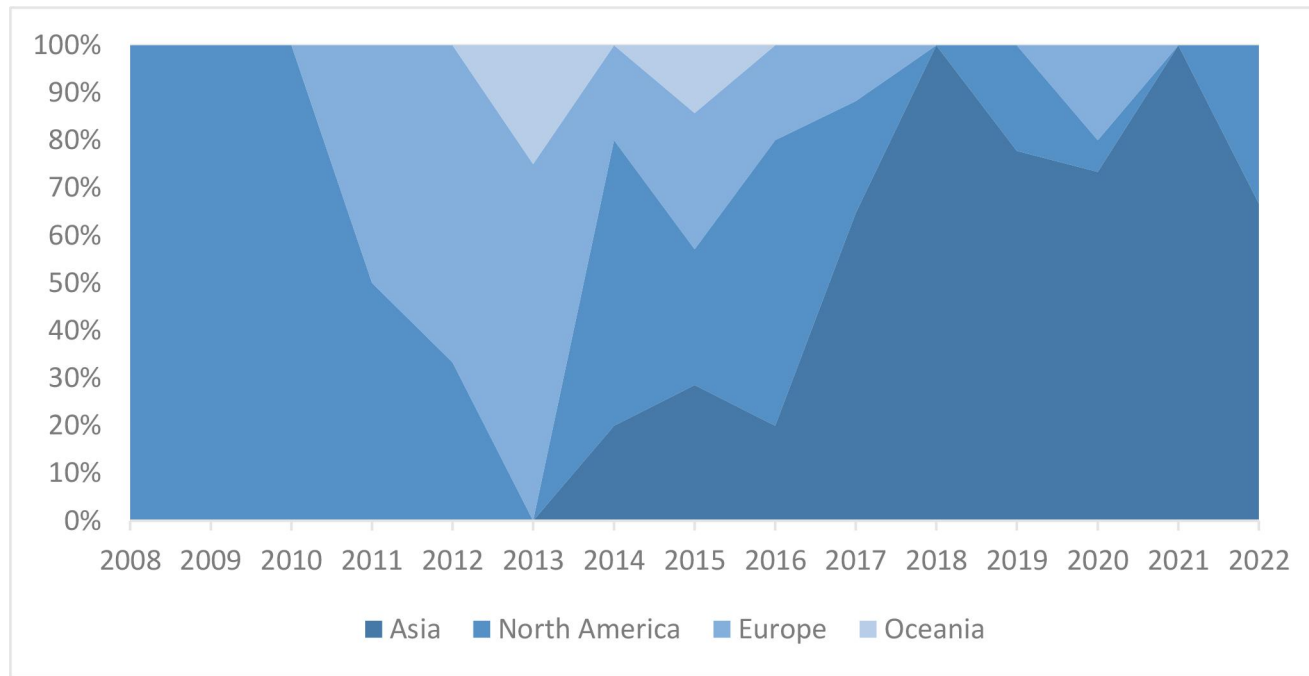

Fig.S3 Fractions of articles from each continent from January 2008 to February 2022.

Supplementary materials - Fig.S4 Publication of articles on different cancer types in four continents

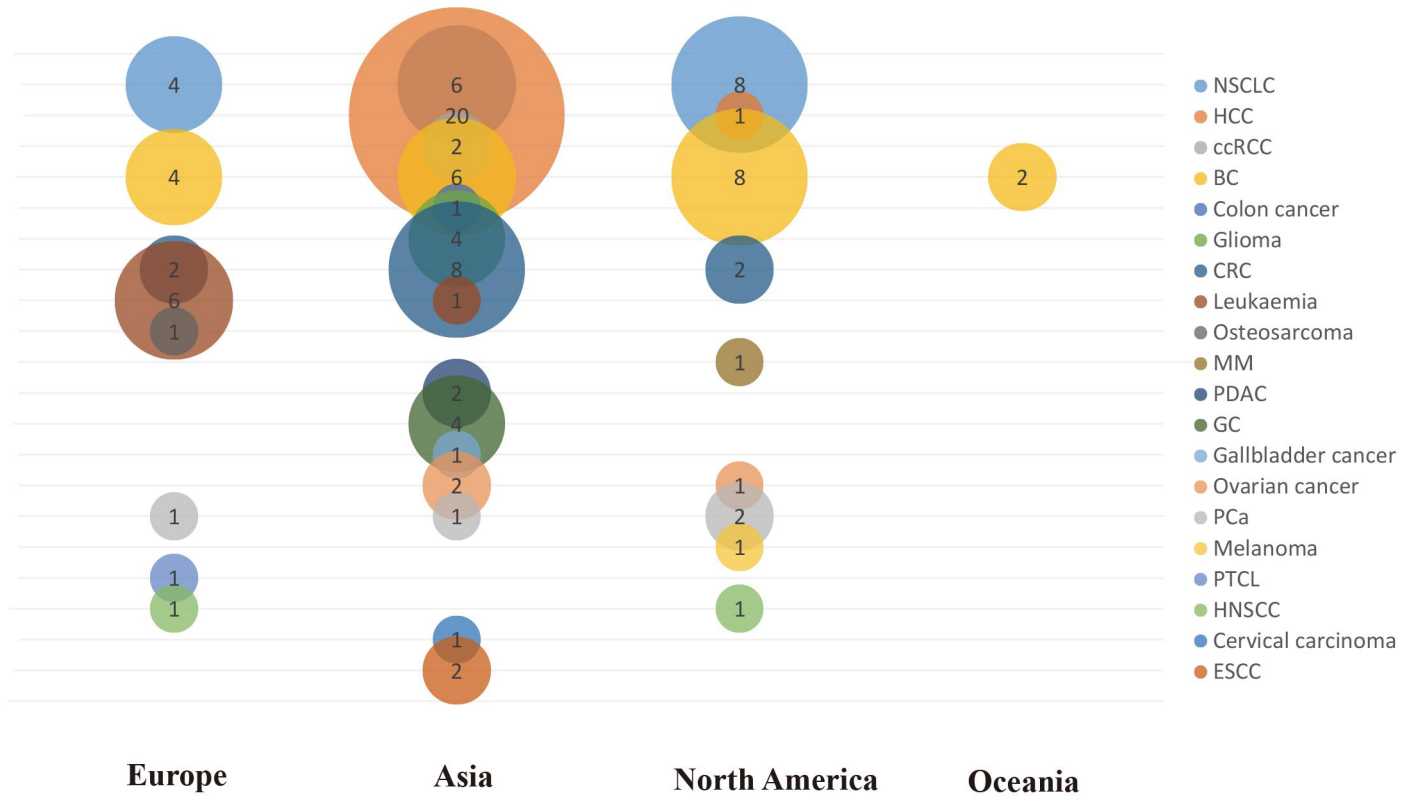

Fig.S4 Publication of articles on different cancer types in four continents.

Abbreviations: NSCLC = Non-small cell lung cancer, HCC = Hepatocellular carcinoma, ccRCC = Clear cell renal cell carcinoma, BC = Breast cancer, CRC = Colorectal cancer, MM = Multiple myeloma, PDAC = Pancreatic ductal adenocarcinoma, GC = Gastric cancer, PCa = Prostate cancer, PTCL = Peripheral T-cell lymphoma, HNSCC = Head and neck squamous cell carcinoma, ESCC = Esophageal squamous cell carcinoma.



Supplementary materials - Fig.S5 The relationship between deregulated snoRNAs and cancer cell phenotype.

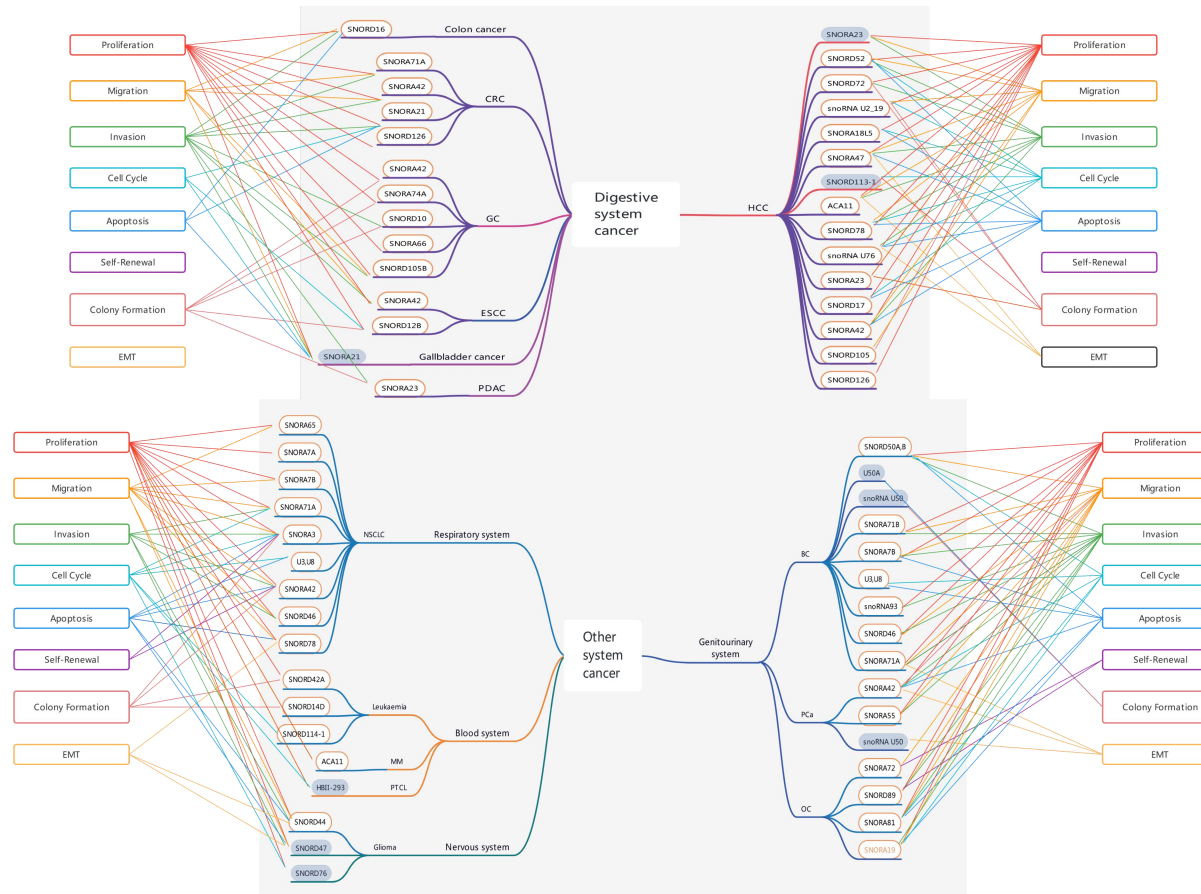

Fig.S5 The relationship between deregulated snoRNAs and cancer cell phenotype.  
 Abbreviations: HCC = hepatocellular carcinoma, PDAC = pancreatic ductal adenocarcinoma, CRC = colorectal cancer, BC = Breast cancer, PCa = Prostate cancer, OC = Ovarian cancer, NSCLC = Non-small cell lung cancer, MM = Multiple myeloma, PTCL = Peripheral T-cell lymphoma, EMT = epithelial-mesenchymal transition, ESCC = Esophageal squamous cell carcinoma.
